# Supplementary material
Source: publisher site journal article supplement (https://www.dovepress.com/article/435806)
Supplement: Supplementary file 1 [file get_supplementary_file.php]

**Supporting information**

**
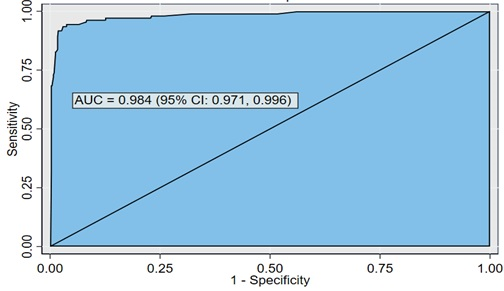
**

**S1 Figure: ROC curve of stroke prediction model**

**S1 Table****: Predictor scores for stroke risk prediction model nomogram at UoGCSH, 2012-2022**

| Predictor | Category | Score |
| --- | --- | --- |
| Sex |  |  |
|  | Female | 0 |
|  | Male | 4.7 |
| Residence |  |  |
|  | Rural | 0 |
|  | Urban | 4.4 |
| Baseline DBP |  |  |
|  | 80-99mmHg | 0 |
|  | ≥100mmHg | 10 |
| Comorbidity |  |  |
|  | No | 0 |
|  | Yes | 5.8 |
| DM |  |  |
|  | No | 0 |
|  | Yes | 3.7 |
| Uncontrolled HTN |  |  |
|  | No | 0 |
|  | Yes | 7 |

**S2 Table****: Performance of the risk scores at different cutoff points**

| **Cutoff Point** | **Sensitivity** | **Specificity** | **PPV** | **NPV** | **LR+** | **LR-** |
| --- | --- | --- | --- | --- | --- | --- |
| >0.15 | 94.59% | 91.14% | 65.22% | 98.97% | 10.68 | 0.06 |
| >0.16 | 92.79% | 92.88% | 69.59% | 98.66% | 13.03 | 0.08 |
| >0.20 | 92.79% | 93.51% | 71.53% | 98.66% | 14.3 | 0.08 |
| >0.22 | 90.99% | 93.67% | 71.63% | 98.34% | 14.38 | 0.1 |
| >0.24 | 90.99% | 94.46% | 74.26% | 98.35% | 16.43 | 0.1 |

**S3 Table:** **the ANN estimated importance of predictors in classifying stroke at UoGCSH, 2012-2022.**

| **Independent Variable Importance** | | |
| --- | --- | --- |
|  | Importance | Normalized Importance |
| Sex | 0.077 | 63.6% |
| Residence | 0.067 | 55.3% |
| Salt reduction in meal | 0.025 | 20.8% |
| Baseline SBP | 0.111 | 92.2% |
| Baseline DBP | 0.098 | 81.4% |
| Stroke history | 0.047 | 39.0% |
| Comorbidity | 0.112 | 92.7% |
| DM | 0.048 | 39.4% |
| Uncontrolled HTN | 0.121 | 100.0% |
| Cholesterol | 0.016 | 12.9% |
| HDL | 0.097 | 80.4% |
| LDL | 0.108 | 89.8% |
| Triglyceride | 0.074 | 61.0% |

**
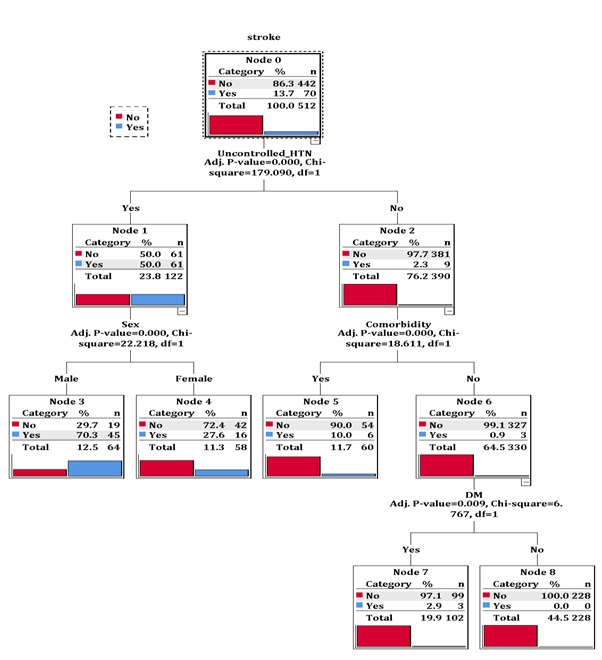
**

**S2 Figure: Classification and decision tree model of the training data**

**
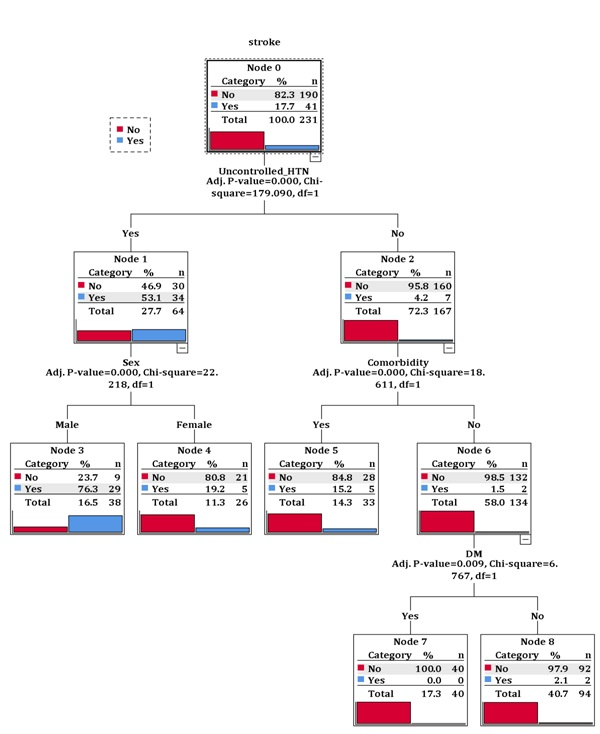
**

**S3 Figure: Classification and decision tree model of the test data**

**S4 Table****: Comparison of multivariable logistic regression model and machine learning algorithms at UoGCSH, 2012-2022**

| **Model** | **Cutoff**  **point** | **AUC**  **(CI)** | **Sensitivity**  **(CI)** | **Specificity**  **(CI)** | **PPV**  **(CI)** | **NPV**  **(CI)** | **Accuracy**  **(CI)** |
| --- | --- | --- | --- | --- | --- | --- | --- |
| Logistic regression | 0.20 | 97.3%  (95.9, 98.7) | 92.8%  (86.3, 96.8) | 93.5%  (91.3, 95.3) | 71.5%  (63.4, 78.7) | 98.7%  (97.4, 99.4) | 93.4%  (91.4, 95.1) |
| Artificial Neural Network (ANN) | 0.44 | 97.3%  (95.8, 98.8) | 90.1%  (83.0, 95.0) | 96.2%  (94.4, 97.6) | 80.7%  (72.6, 87.2) | 98.2  (96.8, 99.1) | 95.3%  (93.5, 96.7) |
| Decision tree (DT) | 0.11 | 94.8%  (92.4, 97.2) | 93.7%  (87.4, 97.4) | 86.1%  (83.1, 88.7) | 54.2%  (46.8, 61.4) | 98.7%  (97.4, 99.5) | 87.2%  (84.6, 89.5) |
| Random forest | 0.28 | 96.5%  (95.1, 97.9) | 93.7%  (87.4, 97.4) | 91.9%  (89.5, 93.9) | 67.1%  (59.1, 74.4) | 98.8%  (97.6, 99.5) | 92.2%  (90.0, 94.0) |

***Note: AUROC: Area under the Roc Curve, CI: Confidence Interval, PPV: Positive Predictive Value, NPV: Negative Predictive Value***
